# Supplementary material for: Indicators to measure the performance of emergency trauma care
Source: PubMed Central journal article supplement — Rev Med Inst Mex Seguro Soc. 2023 Nov-Dec;61(6):819–40. [Article in Spanish] doi: 10.5281/zenodo.10064412 (PMC10721338; doi:10.5281/zenodo.10064412), 2023
Supplement: 04435117-61-6-819-SM1.pdf [file 04435117-61-6-819-SM1.pdf]

## Anexo 1 Resultados de indicadores en las investigaciones identificadas

| Autor, año                                                      | Diseño de estudio      | Bases de datos consultadas                                            | Tipo de indicador analizado                                                                                                                                                                                                                                                                                                                                                                                                                                                                                                                                                                                                                                                                                                                                                                                                                                                                                                                                                        |                                                        |
|-----------------------------------------------------------------|------------------------|-----------------------------------------------------------------------|------------------------------------------------------------------------------------------------------------------------------------------------------------------------------------------------------------------------------------------------------------------------------------------------------------------------------------------------------------------------------------------------------------------------------------------------------------------------------------------------------------------------------------------------------------------------------------------------------------------------------------------------------------------------------------------------------------------------------------------------------------------------------------------------------------------------------------------------------------------------------------------------------------------------------------------------------------------------------------|--------------------------------------------------------|
|                                                                 |                        |                                                                       | Proceso                                                                                                                                                                                                                                                                                                                                                                                                                                                                                                                                                                                                                                                                                                                                                                                                                                                                                                                                                                            | Resultado                                              |
| <b>Servicio analizado Atención Médica Prehospitalaria (AMP)</b> |                        |                                                                       |                                                                                                                                                                                                                                                                                                                                                                                                                                                                                                                                                                                                                                                                                                                                                                                                                                                                                                                                                                                    |                                                        |
| Henry, 2012 <sup>15</sup>                                       | Revisión de literatura | <i>PubMed, Medline, WEB ISI, Google Scholar y LILACS (secundaria)</i> | <ul style="list-style-type: none"> <li>- Tiempo de AMP: el tiempo medio desde la lesión hasta el primer contacto médico en el campo (minutos)</li> <li>- El tiempo en la escena: tiempo desde que los proveedores AMP llegan al lugar hasta que inician el transporte del paciente (minutos)</li> </ul>                                                                                                                                                                                                                                                                                                                                                                                                                                                                                                                                                                                                                                                                            | - Análisis comparativo de la mortalidad durante la AMP |
| Jansen, 2015 <sup>16</sup>                                      | Cohorte prospectiva    | Registros de trauma (Primaria)                                        | <ul style="list-style-type: none"> <li>- Triage: especificaron un esquema de decisión con base en preguntas clave para clasificar los traumatismos y su severidad, en función de esto decidían transferir al centro de trauma más apropiado, ya sea a centros traumatológicos especializados (3er nivel de atención), hospitales regionales (2do nivel de atención) y unidades locales de atención (1er nivel de atención). Finalmente analizaron el cumplimiento</li> <li>- Para traslados terrestres: establecieron tiempos de conducción para cada unidad de atención (minutos), incorporaron variables como: día de la semana, hora, tipo de carretera y densidad poblacional</li> <li>- Para traslados aéreos establecieron: tiempo de vuelo desde la base hasta la ubicación del incidente (minutos), tiempos promedio de carga (minutos) y tiempo de vuelo hasta el destino (minutos). Establecieron puntos de corte para los tiempos de acceso de 45-60 minutos</li> </ul> |                                                        |

|                                 |             |                                                                |                                                                                                                                                                                                                                                                                                                                                                                                                                                                                                                                                                                                                                                                                                                                                                                                                                                                                                                                                                                                                                                                                                                                                                                                                                                                                     |                                                                                                                                                                                                                                                                                                                                                 |
|---------------------------------|-------------|----------------------------------------------------------------|-------------------------------------------------------------------------------------------------------------------------------------------------------------------------------------------------------------------------------------------------------------------------------------------------------------------------------------------------------------------------------------------------------------------------------------------------------------------------------------------------------------------------------------------------------------------------------------------------------------------------------------------------------------------------------------------------------------------------------------------------------------------------------------------------------------------------------------------------------------------------------------------------------------------------------------------------------------------------------------------------------------------------------------------------------------------------------------------------------------------------------------------------------------------------------------------------------------------------------------------------------------------------------------|-------------------------------------------------------------------------------------------------------------------------------------------------------------------------------------------------------------------------------------------------------------------------------------------------------------------------------------------------|
| Mehmood,<br>2018 <sup>17</sup>  | Descriptivo | Modelos de sistemas de salud OMS y modelos de AMP (secundaria) | <ul style="list-style-type: none"> <li>- Cobertura en población urbana y rural</li> <li>- Cumplimiento de protocolos de atención y triaje, tiempo total de atención y tiempo de respuesta, no especifica unidad de medida</li> <li>- Uso de tecnología y sistema de datos</li> <li>- Tendencias en la utilización de atención de emergencias para causas específicas</li> <li>- Implementación y uso de sistemas de referencia</li> <li>- Supervisión y evaluación continua de la atención</li> <li>- Protección jurídica de los rescatistas y del personal de AMP</li> </ul>                                                                                                                                                                                                                                                                                                                                                                                                                                                                                                                                                                                                                                                                                                       | <ul style="list-style-type: none"> <li>- Mejora de la supervivencia de durante la AMP</li> <li>- Reducir los gastos de bolsillo y gastos catastróficos</li> <li>- Supervisión y evaluación continua de la responsabilidad de la AMP</li> </ul> <p>Satisfacción:</p> <ul style="list-style-type: none"> <li>- AMP segura y de calidad</li> </ul> |
| Mommssen,<br>2012 <sup>18</sup> | Transversal | Base de datos de rescate aéreo alemán (secundaria)             | <ul style="list-style-type: none"> <li>- Aplicación de triaje a personas con diagnósticos sensibles al tiempo en estos: trauma múltiple, lesión cerebral traumática, quemaduras, ataque cardíaco, accidente cerebrovascular y emergencia pediátrica, independientemente del horario (día vs. noche)</li> <li>- Tiempo de atención incluye: hora de llegada, tiempo en la escena, tiempo de transporte y distancias de vuelo (minutos) <ul style="list-style-type: none"> <li>- Tiempo de llegada: lapso entre la llamada de alarma entrante y el aterrizaje en el sitio de operación. El helicóptero debe estar en el aire dentro de los 2 minutos posteriores a la llamada</li> <li>- Tiempo de escena se refiere al tiempo de atención en el sitio donde ocurrió la lesión</li> <li>- Tiempo de transporte: lapso entre la puesta en marcha en el sitio de operación y el aterrizaje en el helipuerto del hospital</li> </ul> </li> </ul> <p>Los tiempos de llegada y transporte de AMP aérea se compararon con la AMP terrestre. Para ambulancias en tráfico urbano se calculó retrospectivamente una velocidad media de 44 km/h con base en 30 misiones de emergencia urbana de AMP terrestre. Para caminos rurales y carreteras se calculó una velocidad de 110 km/h y 120</p> | <ul style="list-style-type: none"> <li>-Tasa de mortalidad durante la AMP</li> </ul>                                                                                                                                                                                                                                                            |

|                                    |                        |                                                                                                                                                                          |                                                                                                                                                                                                                                                                                                                                                                                                                                         |                                                                                                                                                                                                                                                                              |
|------------------------------------|------------------------|--------------------------------------------------------------------------------------------------------------------------------------------------------------------------|-----------------------------------------------------------------------------------------------------------------------------------------------------------------------------------------------------------------------------------------------------------------------------------------------------------------------------------------------------------------------------------------------------------------------------------------|------------------------------------------------------------------------------------------------------------------------------------------------------------------------------------------------------------------------------------------------------------------------------|
|                                    |                        |                                                                                                                                                                          | km/h, respectivamente, por el mismo método. Sobre la base de estos valores medios de velocidad, se calculó el tiempo de llegada de AMP terrestre                                                                                                                                                                                                                                                                                        |                                                                                                                                                                                                                                                                              |
| Vainionpää, 2011 <sup>19</sup>     | Cohorte retrospectiva  | Registros de los centros de despacho y apoyo táctico del servicio médico de emergencias (policía, emergencias médicas y bomberos) y registros hospitalarios (secundaria) | <ul style="list-style-type: none"> <li>- Tiempo de solicitud: desde que reciben la llamada hasta el despacho de la ambulancia (segundos)</li> <li>- Tiempo de envío: desde el despacho hasta que llega una unidad de auxilio (minutos)</li> <li>- Tiempo de envío ambulancia: desde el envío hasta que una unidad médica llega al lugar (minutos)</li> <li>- Tiempo de traslado: desde la escena hasta el hospital (minutos)</li> </ul> |                                                                                                                                                                                                                                                                              |
| Wilson, 2017 <sup>20</sup>         | Revisión de literatura | <i>EMBASE, MEDLINE(R), PubMed, SciELO, Trip, Web of Science y Zetoc</i> (secundaria)                                                                                     | <p>Análisis comparativo del efecto de personas con lesiones traumáticas transportados por:</p> <ul style="list-style-type: none"> <li>- Paramédicos con &gt; 1500 horas de trabajo de curso y experiencia clínica</li> <li>- Médicos a cargo del equipo de trauma</li> <li>- Enfermeras con 2 años de capacitación y capacitadas para realizar intubación</li> </ul>                                                                    | <p>Mortalidad:</p> <ul style="list-style-type: none"> <li>- A las 24 horas</li> <li>- Intrahospitalaria</li> <li>- A los 3 meses</li> <li>- A los 30 días</li> <li>- A un año</li> </ul> <p>Discapacidad: se midió como la escala de resultados de Glasgow a los 6 meses</p> |
| <b>Servicios de urgencias (SU)</b> |                        |                                                                                                                                                                          |                                                                                                                                                                                                                                                                                                                                                                                                                                         |                                                                                                                                                                                                                                                                              |

|                              |                        |                                                           |                                                                                                                                                                                                                                                                                                                                                                                                                                                                                                                                                                                                                                                                                                                                                                                                                                                                                                                                                                                                                                                                                      |                                                                                                                                                                                                                                                                                                                                                                                                                                  |
|------------------------------|------------------------|-----------------------------------------------------------|--------------------------------------------------------------------------------------------------------------------------------------------------------------------------------------------------------------------------------------------------------------------------------------------------------------------------------------------------------------------------------------------------------------------------------------------------------------------------------------------------------------------------------------------------------------------------------------------------------------------------------------------------------------------------------------------------------------------------------------------------------------------------------------------------------------------------------------------------------------------------------------------------------------------------------------------------------------------------------------------------------------------------------------------------------------------------------------|----------------------------------------------------------------------------------------------------------------------------------------------------------------------------------------------------------------------------------------------------------------------------------------------------------------------------------------------------------------------------------------------------------------------------------|
| Almasi, 2021 <sup>21</sup>   | Revisión de literatura | EMBASE, Web of Science, PubMed y Scopus (secundaria)      | <ul style="list-style-type: none"> <li>- Cómo llegaron los pacientes al servicio de urgencias (AMP o por sus propios medios)</li> <li>- Número de pacientes: <ul style="list-style-type: none"> <li>- Según el nivel de triaje</li> <li>- En el servicio de urgencias</li> <li>- En espera de visita médica</li> <li>- Datos de alta del servicio de urgencias en 6 horas</li> </ul> </li> <li>- Tiempo medio transcurrido (TMT) desde la solicitud de ingreso del médico hasta la asignación de habitación/cama al paciente en la sala de hospitalización</li> <li>- Tiempo de triaje: TMT desde la llegada de la persona lesionada a urgencias hasta el inicio del triaje</li> <li>- TMT desde la llegada de los pacientes a urgencias hasta la visita al médico</li> <li>- TMT desde que se registran las órdenes hasta que están listos los resultados (pruebas, imágenes, electrocardiografía)</li> <li>- Número medio de visitas realizadas por el médico por hora</li> <li>- Número de pruebas ordenadas por los médicos</li> <li>- Número de consultas realizadas</li> </ul> | <ul style="list-style-type: none"> <li>- Reingreso de pacientes (antes de las 72 horas)</li> <li>- Porcentaje de mortalidad entre los pacientes ingresados en SU</li> <li>- El porcentaje de mortalidad entre los pacientes del hospital ingresados por el SU</li> </ul> <p>Satisfacción:</p> <ul style="list-style-type: none"> <li>- Número de pacientes que abandonan el SU sin evaluación y tratamiento primarios</li> </ul> |
| Boschini, 2016 <sup>22</sup> | Cohorte retrospectiva  | Diseño de formato y recolección de información (primaria) | <p>Tipo de transporte para llegar al hospital clasificado en:</p> <ul style="list-style-type: none"> <li>- No motorizado (a pie, bicicleta)</li> <li>- Motorizado (moto, autobús, vehículo privado y público)</li> <li>- Vehículo de emergencia (ambulancia, policía)</li> </ul> <p>- Tiempo de atención: lapso entre la lesión y la admisión a SU (minutos)</p>                                                                                                                                                                                                                                                                                                                                                                                                                                                                                                                                                                                                                                                                                                                     | <ul style="list-style-type: none"> <li>- Tasa de mortalidad intrahospitalaria</li> </ul>                                                                                                                                                                                                                                                                                                                                         |
| Cameron, 2019 <sup>23</sup>  | Cohorte retrospectiva  | Registro de trauma                                        | <p>Implementación de triaje:</p> <ul style="list-style-type: none"> <li>- Subtriaje: un trauma mayor sin activación del equipo de trauma</li> <li>- Sobretriaje: la activación del equipo de trauma sin trauma mayor</li> </ul>                                                                                                                                                                                                                                                                                                                                                                                                                                                                                                                                                                                                                                                                                                                                                                                                                                                      | <ul style="list-style-type: none"> <li>- Mortalidad durante estancia en el SU</li> <li>- Mortalidad durante la intervención quirúrgica</li> </ul>                                                                                                                                                                                                                                                                                |

|                            |                        |                                                                                                |                                                                                                                                                                                                                                                                                                                                                                                                                                                                                                                                                                                                                                                                                                             |                                                                                                                    |
|----------------------------|------------------------|------------------------------------------------------------------------------------------------|-------------------------------------------------------------------------------------------------------------------------------------------------------------------------------------------------------------------------------------------------------------------------------------------------------------------------------------------------------------------------------------------------------------------------------------------------------------------------------------------------------------------------------------------------------------------------------------------------------------------------------------------------------------------------------------------------------------|--------------------------------------------------------------------------------------------------------------------|
|                            |                        | hospitalario de Real Darwin (secundaria)                                                       |                                                                                                                                                                                                                                                                                                                                                                                                                                                                                                                                                                                                                                                                                                             | - Periodo de estancia en UCI                                                                                       |
| Caputo, 2013 <sup>24</sup> | Revisión de literatura | <i>PubMed</i> y literatura de enfermería y salud relacionada ( <i>EbscoHost</i> ) (secundaria) | Relación entre capacidad del centro de trauma (volumen) o el número de pacientes de trauma por cirujano:<br>- Volumen alto: ( $\geq 240$ o $> 1200$ o $\geq 650$ o $> 250$ o $\geq 2000$ o $> 480$ )<br>- Volumen medio (180 < 240 o de 240 - 480 o 151 - 250)<br>- Volumen bajo (< 180 o < 240 o > 150 o $\leq 1200$ o < 2000)                                                                                                                                                                                                                                                                                                                                                                             | Mortalidad intrahospitalaria                                                                                       |
| Cole, 2013 <sup>25</sup>   | Transversal            | Registros hospitalarios de traumatología y hospitalización (secundaria)                        | -Tiempo hasta:<br><ul style="list-style-type: none"> <li>• La evaluación enfocada con ecografía en trauma (minutos)</li> <li>• La tomografía axial computarizada (TAC) (minutos)</li> <li>• El control de la hemorragia (intervención quirúrgica o angioembolización)</li> </ul>                                                                                                                                                                                                                                                                                                                                                                                                                            | - Mortalidad intrahospitalaria<br>- Periodo de estancia en UCI (días)<br>- Periodo de estancia hospitalaria (días) |
| Wesson, 2013 <sup>26</sup> | Estudio de caso        | Diseño e implementación de encuestas (primaria)                                                | - Identificación de capacidades clínicas organizacionales y administrativas, y calificando como:<br><ul style="list-style-type: none"> <li>• <i>Adecuado</i>: presente y se usó apropiadamente</li> <li>• <i>Parcialmente adecuado</i>: presente pero el uso no estaba asegurado, no estaba disponible en todo momento o no estaba fácilmente disponible</li> <li>• <i>Inadecuado</i>: presente dentro del hospital, pero no funcional</li> <li>• <i>Ausente</i>: no presente en el hospital</li> </ul> - Las categorías analizadas fueron: disponibilidad de equipo de traumatología, disponibilidad de quirófano, departamento de rayos X, unidad de cuidados intensivos, número de camas, disponibilidad |                                                                                                                    |

|                               |                       |                                                                                       |                                                                                                                                                                                                                                                                                                                                                                                                                                                                                                                                                                                                                                   |                                                                                                                                                                                                                                                               |
|-------------------------------|-----------------------|---------------------------------------------------------------------------------------|-----------------------------------------------------------------------------------------------------------------------------------------------------------------------------------------------------------------------------------------------------------------------------------------------------------------------------------------------------------------------------------------------------------------------------------------------------------------------------------------------------------------------------------------------------------------------------------------------------------------------------------|---------------------------------------------------------------------------------------------------------------------------------------------------------------------------------------------------------------------------------------------------------------|
|                               |                       |                                                                                       | <p>de electrocardiograma, número de equipos de oxígeno, número de monitores de presión arterial, número de ventiladores mecánicos, disposición de <i>carro de reanimación</i>, disposición de equipos básicos para manejo de vías aéreas, fármacos para soporte vital cardiaco, número equipos de ultrasonido, disposición de sistema de registro médico electrónico, equipo para inmovilización de fracturas</p> <p>Esta información permitió realizar diagramas de flujo de los sistemas de atención traumatológica y esto a su vez tomar mejores decisiones para el tratamiento de personas con lesiones por causa externa</p> |                                                                                                                                                                                                                                                               |
| Havermans, 2019 <sup>27</sup> | Cohorte retrospectiva | Registros de trauma y los registros hospitalarios (primaria)                          | <ul style="list-style-type: none"> <li>- Tiempo en la sala de trauma (minutos)</li> <li>- Ingreso a UCI (minutos)</li> <li>- Tiempo hasta la TAC (minutos)</li> <li>- Diagnóstico tardío: diagnóstico encontrado después de la encuesta de trauma terciario</li> </ul>                                                                                                                                                                                                                                                                                                                                                            | <p>Mortalidad en:</p> <ul style="list-style-type: none"> <li>- Sala de trauma</li> <li>- En las 48 h</li> <li>- Intrahospitalaria total</li> <li>- Presencia de complicaciones (<b>anexo 1</b>)</li> <li>- Periodo de estancia hospitalaria (días)</li> </ul> |
| Kuimi, 2015 <sup>28</sup>     | Cohorte retrospectiva | Base de datos de altas hospitalarias médico-administrativas provinciales (secundaria) | <ul style="list-style-type: none"> <li>- Acceso a sistema de trauma integrado: transporte a un centro de trauma desde la escena del accidente (acceso directo) o traslado a un centro de trauma desde un hospital no designado (acceso indirecto)</li> </ul>                                                                                                                                                                                                                                                                                                                                                                      | <ul style="list-style-type: none"> <li>- Mortalidad intrahospitalaria</li> <li>- Periodo de estancia hospitalaria (días)</li> </ul>                                                                                                                           |
| Lansink, 2013 <sup>29</sup>   | Cohorte prospectiva   | Sistema de traumatología provincial y registros                                       | <ul style="list-style-type: none"> <li>- Implementación de protocolos de transfusión masiva y protocolos para realización de TAC</li> </ul>                                                                                                                                                                                                                                                                                                                                                                                                                                                                                       | <ul style="list-style-type: none"> <li>- Mortalidad intrahospitalaria</li> <li>- Periodo de estancia en el servicio de urgencias (días)</li> <li>- Periodo de estancia en UCI (días) y</li> </ul>                                                             |

|                            |                        |                                                       |                                                                                                                                                                                                                                                                                                                                                                                                                                                |                                                                                                                                                                                                                                                                                                                                                                                                                                                                                                                                                                                                                                                                                                                                                                                                                                                                               |
|----------------------------|------------------------|-------------------------------------------------------|------------------------------------------------------------------------------------------------------------------------------------------------------------------------------------------------------------------------------------------------------------------------------------------------------------------------------------------------------------------------------------------------------------------------------------------------|-------------------------------------------------------------------------------------------------------------------------------------------------------------------------------------------------------------------------------------------------------------------------------------------------------------------------------------------------------------------------------------------------------------------------------------------------------------------------------------------------------------------------------------------------------------------------------------------------------------------------------------------------------------------------------------------------------------------------------------------------------------------------------------------------------------------------------------------------------------------------------|
|                            |                        | médicos hospitalarios (secundaria)                    |                                                                                                                                                                                                                                                                                                                                                                                                                                                | - Periodo de estancia hospitalaria (días)                                                                                                                                                                                                                                                                                                                                                                                                                                                                                                                                                                                                                                                                                                                                                                                                                                     |
| Madsen, 2015 <sup>30</sup> | Revisión de literatura | <i>PubMed, EMBASE, CINAHL y COCHRANE</i> (secundaria) | <ul style="list-style-type: none"> <li>- Tiempo (en minutos) hasta: <ul style="list-style-type: none"> <li>- Iniciar el tratamiento</li> <li>- El diagnóstico</li> <li>- Manejo del dolor</li> </ul> </li> <li>- Diagnóstico correcto</li> <li>- Tratamiento apropiado</li> <li>- Triage vs. tiempo para ver al proveedor</li> <li>- Participación del paciente en su propio cuidado</li> <li>- Desempeño médico evaluado por pares</li> </ul> | <ul style="list-style-type: none"> <li>- Reingreso a la unidad de atención</li> <li>- Período de estancia hospitalaria (días)</li> <li>- Mortalidad intrahospitalaria</li> </ul> <p>Satisfacción del prestador de servicios:</p> <ul style="list-style-type: none"> <li>- Satisfacción del proveedor, actitud y respeto</li> <li>- Carga de trabajo del médico</li> <li>- Seguridad del personal</li> </ul> <p>Satisfacción el usuario:</p> <ul style="list-style-type: none"> <li>- Ocupación/ hacinamiento en el servicio de urgencias</li> <li>- Comunicación con el proveedor</li> <li>- Tasa de admisión</li> <li>- Tasa de quejas</li> <li>- Tiempo de espera, actitud y respeto</li> <li>- Control del dolor, higiene en el entorno del SU</li> </ul> <ul style="list-style-type: none"> <li>- Satisfacción del acompañante</li> <li>- Información del alta</li> </ul> |

|                                |             |                                                           |                                                                                                                                                                                                                                                                                                                                                                                                                                                                                                                                                                                                                                                                                                                                                                                                                                                                                                                                                                                                                                                                                                                                                                                                                |                                                                                                                                                                                                                                                   |
|--------------------------------|-------------|-----------------------------------------------------------|----------------------------------------------------------------------------------------------------------------------------------------------------------------------------------------------------------------------------------------------------------------------------------------------------------------------------------------------------------------------------------------------------------------------------------------------------------------------------------------------------------------------------------------------------------------------------------------------------------------------------------------------------------------------------------------------------------------------------------------------------------------------------------------------------------------------------------------------------------------------------------------------------------------------------------------------------------------------------------------------------------------------------------------------------------------------------------------------------------------------------------------------------------------------------------------------------------------|---------------------------------------------------------------------------------------------------------------------------------------------------------------------------------------------------------------------------------------------------|
| Matsushima, 2013 <sup>31</sup> | Transversal | Sistemas de trauma estatal (Secundaria)                   | <ul style="list-style-type: none"> <li>- Exploración por TAC durante la fase de reanimación inicial</li> <li>- Transfusión de sangre en el servicio de urgencias</li> <li>- Craneotomía (sí, no)</li> <li>- Laparotomía (sí, no)</li> </ul>                                                                                                                                                                                                                                                                                                                                                                                                                                                                                                                                                                                                                                                                                                                                                                                                                                                                                                                                                                    | <ul style="list-style-type: none"> <li>- Mortalidad intrahospitalaria,</li> <li>- Presencia de complicaciones (<b>anexo 1</b>)</li> </ul>                                                                                                         |
| Moore, 2015 <sup>32</sup>      | Transversal | Sistema de traumatología provincial (primaria/secundaria) | <ul style="list-style-type: none"> <li>- Traslado de pacientes con TCE con Escala de coma de Glasgow (ECG) &lt; 12 recibidos inicialmente en centros de atención general (1er y 2do nivel de atención)</li> <li>- Traslado de pacientes con fractura abierta/deprimida de cráneo recibidos inicialmente en centros de atención general (1er y 2do nivel de atención)</li> <li>- Traslado de pacientes con lesión medular a centro de agudos de columna</li> <li>- Reducir la dislocación de la articulación principal en &lt; 1 h</li> <li>- Vía aérea asegurada en departamento de emergencias para personas con lesiones traumáticas con ECG &lt; 9</li> <li>- Estabilizar/embolizar fractura pélvica inestable</li> <li>- Cirugía abierta de fractura de huesos largos &lt; 6 h</li> <li>- Cirugía hematoma epidural &lt; 1 h</li> <li>- Cirugía fractura de fémur &lt; 24 h (fracturas de diáfisis femoral)</li> <li>- Estancia en urgencias &lt; 1 h para pacientes intubados o con ECG &lt; 9</li> <li>- Las muertes ocurridas en la sala de hospitalización después 1 h de la llegada (no en el servicio de urgencias)</li> <li>- Estancia en urgencias &lt; 4 h para pacientes con ISS ≥ 15</li> </ul> | <ul style="list-style-type: none"> <li>- Tasas de mortalidad intrahospitalaria</li> <li>- Periodo de estancia hospitalaria (días)</li> <li>- Reingreso no planeado al servicio</li> <li>- Presencia de complicaciones (<b>anexo 1</b>)</li> </ul> |



|                           |                       |                                                  |                                                                                                                                                                                                                                                                                                                                                                                                                                                                                                                                                                                                                                                                                                                                                                                                                                                                                                                                                                                                                                                                                                                                                                                                                                                                                                                                                   |                                                                                                                                                                                                                                                                                                                                                                                                                                                                                                                                                                                                                                                                                                                                                                                                                                                                                                                                                                              |
|---------------------------|-----------------------|--------------------------------------------------|---------------------------------------------------------------------------------------------------------------------------------------------------------------------------------------------------------------------------------------------------------------------------------------------------------------------------------------------------------------------------------------------------------------------------------------------------------------------------------------------------------------------------------------------------------------------------------------------------------------------------------------------------------------------------------------------------------------------------------------------------------------------------------------------------------------------------------------------------------------------------------------------------------------------------------------------------------------------------------------------------------------------------------------------------------------------------------------------------------------------------------------------------------------------------------------------------------------------------------------------------------------------------------------------------------------------------------------------------|------------------------------------------------------------------------------------------------------------------------------------------------------------------------------------------------------------------------------------------------------------------------------------------------------------------------------------------------------------------------------------------------------------------------------------------------------------------------------------------------------------------------------------------------------------------------------------------------------------------------------------------------------------------------------------------------------------------------------------------------------------------------------------------------------------------------------------------------------------------------------------------------------------------------------------------------------------------------------|
|                           |                       |                                                  | <ul style="list-style-type: none"> <li>- Laparotomía terapéutica</li> <li>- Retraso para cirugía abdominal, torácica, cerebral &lt; 24 h</li> <li>- No re intubación dentro de las 48 h posteriores a la extubación</li> </ul>                                                                                                                                                                                                                                                                                                                                                                                                                                                                                                                                                                                                                                                                                                                                                                                                                                                                                                                                                                                                                                                                                                                    |                                                                                                                                                                                                                                                                                                                                                                                                                                                                                                                                                                                                                                                                                                                                                                                                                                                                                                                                                                              |
| Moore, 2013 <sup>33</sup> | Cohorte retrospectiva | Sistema de traumatología provincial (secundaria) | <p>Indicadores compuestos generados a partir de cumplimiento de procedimientos estandarizados emitidos por la Alianza para la Calidad Hospitalaria</p> <p>Indicadores de desempeño del proceso (IDP)</p> <ul style="list-style-type: none"> <li>- Traslado de pacientes con TCE con Escala de coma de Glasgow (ECG) &lt; 12 recibidos inicialmente en centros de atención general (1er y 2do nivel de atención)</li> <li>- Traslado de pacientes con fractura abierta/deprimida de cráneo recibidos inicialmente en centros de atención general (1er y 2do nivel de atención)</li> <li>- Traslado de pacientes con lesión medular a centro de agudos de columna</li> <li>- Reducir la dislocación de la articulación principal en &lt; 1 h</li> <li>- Vía aérea asegurada en departamento de emergencias para personas con lesiones traumáticas con ECG &lt; 9</li> <li>- Estabilizar/embolizar fractura pélvica inestable</li> <li>- Cirugía abierta de fractura de huesos largos &lt; 6 h</li> <li>- Cirugía hematoma epidural &lt; 1 h</li> <li>- Cirugía fractura de fémur &lt; 24 h (fracturas de diáfisis femoral)</li> <li>- Estancia en urgencias &lt; 1 h para pacientes intubados o con ECG &lt; 9</li> <li>- Las muertes ocurridas en la sala de hospitalización después 1 h de la llegada (no en el servicio de urgencias)</li> </ul> | <ul style="list-style-type: none"> <li>- Tasa mortalidad intrahospitalaria,</li> <li>- Se analizaron puntuaciones compuestas a partir de los IDP (indicadores de compuestos)</li> </ul> <p>1. El puntaje promedio del indicador, utilizado para evaluar la calidad de la atención por la Alianza para la Calidad Hospitalaria de EU, se calculó como la suma de las proporciones del IDP que se aplican al hospital bajo evaluación, dividida por el número de IDP que aplicó a ese hospital. Esto es equivalente a ponderar todos los indicadores por igual.</p> <p>2. La puntuación del modelo de oportunidad. Se calcula como la suma de la cantidad de pacientes que recibieron la atención adecuada en todos los indicadores dividida entre la suma de la cantidad de pacientes elegibles en todos los indicadores. Esto es equivalente a ponderar los indicadores por el número de pacientes elegibles. Las estimaciones puntuales y los IDP para cada hospital se</p> |

|                            |                       |                                                             |                                                                                                                                                                                                                                                                                                                     |                                                                                                                                                                                                                                                                                                                                                                                             |
|----------------------------|-----------------------|-------------------------------------------------------------|---------------------------------------------------------------------------------------------------------------------------------------------------------------------------------------------------------------------------------------------------------------------------------------------------------------------|---------------------------------------------------------------------------------------------------------------------------------------------------------------------------------------------------------------------------------------------------------------------------------------------------------------------------------------------------------------------------------------------|
|                            |                       |                                                             | <ul style="list-style-type: none"> <li>- Estancia en urgencias &lt; 4 h para pacientes con ISS <math>\geq</math> 15</li> <li>- Laparotomía terapéutica</li> <li>- Retraso para cirugía abdominal, torácica, cerebral &lt; 24 h</li> <li>- No reintubación dentro de las 48 h posteriores a la extubación</li> </ul> | <p>obtuvieron con un modelo de regresión jerárquica.</p> <p>3. Un puntaje basado en un modelo de variable latente. Los pesos de la variable latente se basan en la variabilidad observada para cada IDP; El IDP con la mayor variación interhospitalaria tendrá el mayor peso. Las puntuaciones compuestas latentes se generaron utilizando un modelo de regresión logística multinivel</p> |
| Moore, 2012 <sup>34</sup>  | Transversal           | Sistema de traumatología provincial (secundaria)            | <ul style="list-style-type: none"> <li>- Implementación de protocolos de triaje</li> <li>- Transferencia de pacientes al centro de atención apropiado de acuerdo las lesiones</li> </ul>                                                                                                                            | - Análisis comparativo de la mortalidad a los 30 días y 6 meses entre personas jóvenes y personas adultas mayores lesionadas                                                                                                                                                                                                                                                                |
| Myers, 2019 <sup>35</sup>  | Cohorte retrospectiva | Base de datos nacional de niños hospitalizados (secundaria) |                                                                                                                                                                                                                                                                                                                     | - Análisis comparativo entre tasa de mortalidad intrahospitalaria de centros pediátricos acreditados comparado con los no acreditados                                                                                                                                                                                                                                                       |
| Sathya, 2015 <sup>36</sup> | Cohorte retrospectiva | Banco Nacional de Datos de Trauma (secundaria)              |                                                                                                                                                                                                                                                                                                                     | - Comparación de la mortalidad intrahospitalaria entre centros de trauma pediátrico, centros de trauma para adultos y centros de trauma mixtos                                                                                                                                                                                                                                              |

|                                         |                                   |                                                                                                           |                                                                                                                                                                                                                                                                                                                                                                                                                                                                                                                                                                                                                                                                                                                                                                                                                                                                                                                                                                                                           |                                                                                                                                                                                                                                                                                                                                                                                                     |
|-----------------------------------------|-----------------------------------|-----------------------------------------------------------------------------------------------------------|-----------------------------------------------------------------------------------------------------------------------------------------------------------------------------------------------------------------------------------------------------------------------------------------------------------------------------------------------------------------------------------------------------------------------------------------------------------------------------------------------------------------------------------------------------------------------------------------------------------------------------------------------------------------------------------------------------------------------------------------------------------------------------------------------------------------------------------------------------------------------------------------------------------------------------------------------------------------------------------------------------------|-----------------------------------------------------------------------------------------------------------------------------------------------------------------------------------------------------------------------------------------------------------------------------------------------------------------------------------------------------------------------------------------------------|
| <p>Sørup,<br/>2013<sup>37</sup></p>     | <p>Revisión de<br/>literatura</p> | <p><i>PubMed,</i><br/><i>Cochrane</i><br/><i>Library y Web</i><br/><i>of Science</i><br/>(secundaria)</p> | <ul style="list-style-type: none"> <li>- Errores de medicación</li> <li>- Errores de tratamiento</li> <li>- Capacitación continua</li> <li>- Tasa de ocupación de camas</li> <li>- Tasa de utilización (equipo de laboratorio)</li> <li>- Número de: <ul style="list-style-type: none"> <li>- ECG tomados</li> <li>- TAC tomadas</li> <li>- Resonancia magnética</li> <li>- Estudios ultrasónicos</li> <li>- Estudios de laboratorio</li> <li>- Consultas de especialidad</li> </ul> </li> <li>- Tasa de utilización (empleados)</li> <li>- Tiempo de: <ul style="list-style-type: none"> <li>- Descarga de ambulancia</li> <li>- Llegada hasta el registro</li> <li>- Llegada hasta evaluación clínica</li> <li>- Llegada hasta iniciar tratamiento</li> <li>- Llegada hasta hospitalización</li> <li>- Llegada hasta triaje</li> <li>- Triaje hasta inicio de tratamiento</li> <li>- Llegada hasta rayos x</li> <li>- De muestra de sangre solicitada (respuesta de laboratorio)</li> </ul> </li> </ul> | <ul style="list-style-type: none"> <li>- Reingreso no planificado (&lt; 72 h)</li> <li>- Periodo de estancia hospitalaria (días)</li> <li>- Mortalidad intrahospitalaria</li> </ul> <p>Satisfacción:</p> <ul style="list-style-type: none"> <li>- Quejas de los usuarios</li> </ul> <p>Del proveedor:</p> <ul style="list-style-type: none"> <li>- Porcentaje de quejas de los empleados</li> </ul> |
| <p>Strudwick,<br/>2019<sup>38</sup></p> | <p>Mixto</p>                      | <p><i>MEDLINE,</i><br/><i>EMBASE,</i><br/><i>CINAHL,</i><br/>literatura gris</p>                          | <ul style="list-style-type: none"> <li>- Disminución del dolor</li> </ul> <p>Numerador (N): disminución significativa del dolor en la reevaluación clínica del dolor inicial posterior al aplicar la misma herramienta validada (disminución de 1.3 puntos en la escala</p>                                                                                                                                                                                                                                                                                                                                                                                                                                                                                                                                                                                                                                                                                                                               | <ul style="list-style-type: none"> <li>- Reingreso a SU no planificada</li> </ul> <p>N: nuevo reingreso no planificada al servicio de urgencias dentro de las 72 h</p>                                                                                                                                                                                                                              |

|  |  |                                                                                                                                                                                                         |                                                                                                                                                                                                                                                                                                                                                                                                                                                                                                                                                                                                                                                                                                                                                                                                                                                                                                                                                                                                                                                                         |                                                                                                                                                                                                                                                                                                                                                                                                                                                                                                                                                                                                                                                                                                                                                                                                                                                                                                                      |
|--|--|---------------------------------------------------------------------------------------------------------------------------------------------------------------------------------------------------------|-------------------------------------------------------------------------------------------------------------------------------------------------------------------------------------------------------------------------------------------------------------------------------------------------------------------------------------------------------------------------------------------------------------------------------------------------------------------------------------------------------------------------------------------------------------------------------------------------------------------------------------------------------------------------------------------------------------------------------------------------------------------------------------------------------------------------------------------------------------------------------------------------------------------------------------------------------------------------------------------------------------------------------------------------------------------------|----------------------------------------------------------------------------------------------------------------------------------------------------------------------------------------------------------------------------------------------------------------------------------------------------------------------------------------------------------------------------------------------------------------------------------------------------------------------------------------------------------------------------------------------------------------------------------------------------------------------------------------------------------------------------------------------------------------------------------------------------------------------------------------------------------------------------------------------------------------------------------------------------------------------|
|  |  | <p>de artículos que describen indicadores de calidad para lesiones músculo esqueléticas en el entorno de urgencias y el sistema de información del departamento de emergencia (primaria/secundaria)</p> | <p>numérica de dolor). Los pacientes que no recibieron una reevaluación del dolor recibieron una puntuación negativa</p> <p>Denominador (D): lesión musculoesquelética, informe de dolor en su puntuación de dolor inicial</p> <p>Excepción (E): puntuación de dolor de 0 o 1 inicial; pacientes que rechazaron la analgesia durante la estadía en el servicio de urgencias</p> <p>- Dolor intenso manejado en 1 hora</p> <p>N: disminución de la puntuación del dolor en <math>\geq 3</math> puntos en escala del dolor en los 60 minutos del tiempo de triaje. Los pacientes que no recibieron una reevaluación del dolor recibieron una puntuación negativa</p> <p>D: lesión musculoesquelética, informando una puntuación de dolor inicial de <math>\geq 7</math> en la escala numérica de clasificación del dolor</p> <p>- Diagnóstico perdido</p> <p>N: cambio de tratamiento o plan de atención debido a una lesión no diagnosticada</p> <p>D: alta domiciliaria por lesión musculoesquelética con seguimiento telefónico o seguimiento en el mismo hospital</p> | <p>D: alta domiciliaria por lesión musculoesquelética</p> <p>- Reingreso no planificado en la comunidad</p> <p>N: paciente sin referencia para su seguimiento y que presentó reingreso no planificado con algún proveedor de la salud en la comunidad o en sector privado por problemas relacionados con su lesión dentro de 1 semana del alta en el SU</p> <p>D: alta domiciliaria por lesión musculoesquelética</p> <p>- Eventos adversos: estreñimiento por opioides</p> <p>N: estreñimiento informado dentro de la semana siguiente tras el alta en el SU</p> <p>D: alta domiciliaria por lesión musculoesquelética con receta de opiáceos y contacto telefónico 1 semana después del alta del SU</p> <p>- Alta en el tiempo objetivo preestablecido</p> <p>N: alta domiciliaria dentro del tiempo objetivo (para esta población = 130 min (tiempo medio desde el triaje hasta el momento del alta en la SU)</p> |
|--|--|---------------------------------------------------------------------------------------------------------------------------------------------------------------------------------------------------------|-------------------------------------------------------------------------------------------------------------------------------------------------------------------------------------------------------------------------------------------------------------------------------------------------------------------------------------------------------------------------------------------------------------------------------------------------------------------------------------------------------------------------------------------------------------------------------------------------------------------------------------------------------------------------------------------------------------------------------------------------------------------------------------------------------------------------------------------------------------------------------------------------------------------------------------------------------------------------------------------------------------------------------------------------------------------------|----------------------------------------------------------------------------------------------------------------------------------------------------------------------------------------------------------------------------------------------------------------------------------------------------------------------------------------------------------------------------------------------------------------------------------------------------------------------------------------------------------------------------------------------------------------------------------------------------------------------------------------------------------------------------------------------------------------------------------------------------------------------------------------------------------------------------------------------------------------------------------------------------------------------|

|                             |             |                                                                           |  |                                                                                                                                                                                                                                                                                                                                                                                                                                                                                                                                                                                                                                                                                                                                                                                                                                                                       |
|-----------------------------|-------------|---------------------------------------------------------------------------|--|-----------------------------------------------------------------------------------------------------------------------------------------------------------------------------------------------------------------------------------------------------------------------------------------------------------------------------------------------------------------------------------------------------------------------------------------------------------------------------------------------------------------------------------------------------------------------------------------------------------------------------------------------------------------------------------------------------------------------------------------------------------------------------------------------------------------------------------------------------------------------|
|                             |             |                                                                           |  | D: lesión musculoesquelética, alta domiciliaria                                                                                                                                                                                                                                                                                                                                                                                                                                                                                                                                                                                                                                                                                                                                                                                                                       |
| Udyavar, 2018 <sup>39</sup> | Transversal | Base de datos estatal de Florida de pacientes hospitalizados (secundaria) |  | <p>- Análisis comparativo de la mortalidad intrahospitalaria por médico tratante y centro de atención</p> <p>Satisfacción:</p> <p>- Información de calidad para el paciente</p> <p>N: pacientes que sintieron que los médicos de urgencias les explicaron su condición y tratamiento de una manera que pudieran entender</p> <p>D: encuesta de experiencia del paciente realizado por teléfono 1 semana después del alta</p> <p>- Cantidad adecuada de información del paciente</p> <p>N: pacientes que sintieron que recibieron la cantidad correcta de información sobre su condición</p> <p>D: encuesta de experiencia del paciente realizado por teléfono 1 semana después del alta</p> <p>- Experiencia positiva del dolor del paciente</p> <p>N: pacientes que sintieron que el personal de urgencias hizo todo lo posible para ayudar a controlar su dolor</p> |

|                                      |                        |                                                                                                                                    |                                                                                                                                                                                                                                                                                                                                                                  |                                                                                                                                                                                                                                                                                                                                                                                                                                                                         |
|--------------------------------------|------------------------|------------------------------------------------------------------------------------------------------------------------------------|------------------------------------------------------------------------------------------------------------------------------------------------------------------------------------------------------------------------------------------------------------------------------------------------------------------------------------------------------------------|-------------------------------------------------------------------------------------------------------------------------------------------------------------------------------------------------------------------------------------------------------------------------------------------------------------------------------------------------------------------------------------------------------------------------------------------------------------------------|
|                                      |                        |                                                                                                                                    |                                                                                                                                                                                                                                                                                                                                                                  | D: encuesta de experiencia del paciente completada en el teléfono de seguimiento de 1 semana                                                                                                                                                                                                                                                                                                                                                                            |
| Van Ditshuizen, 2020 <sup>40</sup>   | Revisión de literatura | <i>Embase, Medline Ovid, Web of Science Core Collection, el registro de ensayos Cochrane Central y Google Scholar (secundaria)</i> | - Análisis comparativo entre el tipo de centro de trauma I, I y III                                                                                                                                                                                                                                                                                              | <ul style="list-style-type: none"> <li>- Análisis comparativo entre diferentes niveles de centros de atención traumatológica en términos de:</li> <li>- Mortalidad intrahospitalaria</li> <li>- Mortalidad a 30, 90 días y 1 año después del alta</li> <li>- Periodo de estancia hospitalaria (días)</li> <li>- Periodo de estancia hospitalaria en UCI (días)</li> <li>- Seguimiento de calidad de vida a las 6, 12 y 24 meses, discapacidad severa al alta</li> </ul> |
| <b>Servicios analizados AMP y SU</b> |                        |                                                                                                                                    |                                                                                                                                                                                                                                                                                                                                                                  |                                                                                                                                                                                                                                                                                                                                                                                                                                                                         |
| Apodaca, 2013 <sup>41</sup>          | Cohorte retrospectiva  | Registro de trauma del departamento de defensa (primaria)                                                                          | - Análisis comparativo entre tres diferentes programas de AMP                                                                                                                                                                                                                                                                                                    | - Mortalidad intrahospitalaria y comparación de supervivencia esperada vs observada                                                                                                                                                                                                                                                                                                                                                                                     |
| Bossers, 2015 <sup>42</sup>          | Revisión de literatura | PubMed, Embase y Web of Science (secundaria)                                                                                       | <p>- Análisis comparativo entre el nivel de experiencia en la realización de intubaciones endotraqueales del grupo de proveedores que brindan AMP. Los estudios se etiquetaron como:</p> <ul style="list-style-type: none"> <li>- Experiencia limitada: si la intubación la realizaba personal con habilidades básicas en esta técnica y que, realiza</li> </ul> | <ul style="list-style-type: none"> <li>- Mortalidad durante la AMP</li> <li>- Mortalidad en el SU</li> </ul>                                                                                                                                                                                                                                                                                                                                                            |

|                            |                       |                                                                                                     |                                                                                                                                                                                                                                                                                                                                                                                                                                                                                                                                                                                                                                                 |                                                                                                                                                                                                                                                                                               |
|----------------------------|-----------------------|-----------------------------------------------------------------------------------------------------|-------------------------------------------------------------------------------------------------------------------------------------------------------------------------------------------------------------------------------------------------------------------------------------------------------------------------------------------------------------------------------------------------------------------------------------------------------------------------------------------------------------------------------------------------------------------------------------------------------------------------------------------------|-----------------------------------------------------------------------------------------------------------------------------------------------------------------------------------------------------------------------------------------------------------------------------------------------|
|                            |                       |                                                                                                     | <p>intubaciones con poca frecuencia (técnicos de emergencias médicas y paramédicos con un alcance de práctica limitado).</p> <ul style="list-style-type: none"> <li>- Experiencia extendida: si la intubación fue realizada por médicos de urgencias prehospitalarias o enfermeras/paramédicos con un amplio alcance de práctica y capacitación (p.ej., paramédicos/enfermeras de cuidados intensivos especialmente capacitados).</li> <li>- Indeterminados: aquellos estudios en los que la población de pacientes fue intubada por un grupo heterogéneo de proveedores o en los que no se pudo determinar el nivel de capacitación</li> </ul> |                                                                                                                                                                                                                                                                                               |
| Brinck, 2015 <sup>43</sup> | Transversal           | Registros de trauma del hospital universitario de Helsinki y registro de trauma alemán (secundaria) | <ul style="list-style-type: none"> <li>- Implementación de directrices nacionales estrictas para la AMP y SU de pacientes traumatizados</li> <li>- Utilización del registro nacional de traumatismos</li> </ul>                                                                                                                                                                                                                                                                                                                                                                                                                                 | - Análisis comparativo de la tasa de mortalidad hospitalaria hasta los 30 días entre Finlandia y Alemania                                                                                                                                                                                     |
| Curtis, 2011 <sup>44</sup> | Transversal           | Sistema de manejo de trauma y lesiones (secundaria)                                                 | <ul style="list-style-type: none"> <li>- Tiempo de atención, desde que ocurrió la lesión hasta llegada al hospital (minutos)</li> <li>- Cumplimiento de protocolos</li> <li>- Análisis comparativo de centros de trauma (nivel I, II y III)</li> </ul>                                                                                                                                                                                                                                                                                                                                                                                          | <p>Análisis comparativo entre diferentes niveles de centros de atención traumatológica en términos de:</p> <ul style="list-style-type: none"> <li>- Periodo de estancia hospitalaria (días)</li> <li>- Periodo de estancia en UCI (días) y</li> <li>- Mortalidad intrahospitalaria</li> </ul> |
| Endo, 2020 <sup>45</sup>   | Cohorte retrospectiva | Base de datos administrativa nacional                                                               | - Número de médicos que trabajan fuera de horario en los centros de emergencia y cuidados críticos                                                                                                                                                                                                                                                                                                                                                                                                                                                                                                                                              | <ul style="list-style-type: none"> <li>- Mortalidad durante la AMP</li> <li>- Mortalidad en el SU</li> </ul>                                                                                                                                                                                  |

|                              |                       |                                                                                                            |                                                                                                                                                                                                                                                                                                                                                                                                                  |                                                                                                                                                                                                                                                       |
|------------------------------|-----------------------|------------------------------------------------------------------------------------------------------------|------------------------------------------------------------------------------------------------------------------------------------------------------------------------------------------------------------------------------------------------------------------------------------------------------------------------------------------------------------------------------------------------------------------|-------------------------------------------------------------------------------------------------------------------------------------------------------------------------------------------------------------------------------------------------------|
|                              |                       | japonesa y el informe anual de evaluación de los centros de cuidados intensivos y emergencias (secundaria) | <ul style="list-style-type: none"> <li>- La realización de neurocirugía de emergencia dentro de los 60 minutos posteriores a la llegada del paciente las 24/7</li> <li>- Acreditación por un organismo externo: Acreditación por el Consejo Japonés para la Atención Médica</li> </ul>                                                                                                                           |                                                                                                                                                                                                                                                       |
| Gitelman, 2013 <sup>46</sup> | Cohorte retrospectiva | Diseño del formato y recolección de información (primaria)                                                 | <ul style="list-style-type: none"> <li>- Tiempo de respuesta de atención de emergencias (minutos informados por las autoridades)</li> <li>- Tiempo medio de respuesta de AMP (estimación en minutos de acuerdo con un algoritmo)</li> <li>- Porcentaje de respuestas de atención de emergencias que satisfacen la demanda</li> </ul>                                                                             | <ul style="list-style-type: none"> <li>- Tasas de mortalidad intrahospitalaria</li> <li>- Periodo de estancia hospitalaria total (días)</li> <li>- Periodo de estancia en UCI (días)</li> </ul>                                                       |
| Gough, 2020 <sup>47</sup>    | Transversal           | Registros de trauma del centro de atención y datos prehospitales estatales (secundaria)                    | <ul style="list-style-type: none"> <li>- Implementación de triaje en el sitio de lesión: las personas que fueron evaluadas y trasladadas directo al centro de atención traumatológica (III nivel), comparados con los que fueron trasladados a centro de atención (II nivel de atención) o centros de atención de I nivel y posteriormente referidos al centro de atención traumatológica (III nivel)</li> </ul> | <ul style="list-style-type: none"> <li>- Periodo de estancia hospitalaria (días)</li> <li>- Mortalidad intrahospitalaria</li> <li>- Realización de craneotomía (si, no)</li> <li>- Presencia de complicaciones (<b>anexo 1</b>)</li> </ul>            |
| Gleich, 2011 <sup>48</sup>   | Transversal           | Base de datos de traumatismos del centro médico infantil                                                   | <ul style="list-style-type: none"> <li>- Tiempo de triaje del departamento de emergencias del hospital de referencia de &lt; 2 horas</li> <li>- El tiempo total de traslado de 6 horas para zonas rurales y 4 horas para zonas urbanas donde se presentó la lesión</li> </ul>                                                                                                                                    | <ul style="list-style-type: none"> <li>- El resultado primario fue la duración de la atención en el hospital de referencia de <math>\geq 2</math> horas antes de la referencia al centro de trauma</li> <li>- Mortalidad intrahospitalaria</li> </ul> |



|                            |                       |                                                                                                                                             |                                                                                                                                                                                                                                                                                         |                                                                                                                                                       |
|----------------------------|-----------------------|---------------------------------------------------------------------------------------------------------------------------------------------|-----------------------------------------------------------------------------------------------------------------------------------------------------------------------------------------------------------------------------------------------------------------------------------------|-------------------------------------------------------------------------------------------------------------------------------------------------------|
|                            |                       | (secundaria)                                                                                                                                |                                                                                                                                                                                                                                                                                         | - Alta a un centro de cuidados crónicos de enfermería y una unidad de rehabilitación                                                                  |
| Gurien, 2015 <sup>49</sup> | Transversal           | Registro de trauma estatal (secundaria)                                                                                                     | - Cumplimiento de protocolos de atención a personas lesionadas usuarias de transporte aéreo a un centro traumatológico en función de su tipo de seguridad social                                                                                                                        | - Periodo de estancia hospitalaria (días),<br>- Periodo de estancia en UCI (días)<br>- Mortalidad intrahospitalaria                                   |
| Haas, 2012 <sup>50</sup>   | Cohorte retrospectiva | Sistema nacional de informes de atención ambulatoria y resúmenes de alta de los institutos canadienses de información de salud (secundaria) | - Implementación del triaje en la escena para referir a la persona lesionada a un centro de trauma especializado u otro centro de atención                                                                                                                                              | - Mortalidad intrahospitalaria a las 24 horas, 48 horas, 7 días y 30 días posteriores al ingreso                                                      |
| Huh, 2021 <sup>51</sup>    | Transversal           | Modificación y mejoras de recolección de datos en sistema de información                                                                    | - Implementación de sistema de información para recopilación y seguimiento de datos de trauma<br>- Creación de equipo de trauma<br>- Criterios de activación de equipo de trauma<br>- Capacitación continua<br>- Implementación de protocolos de atención para pacientes traumatizados: | - Periodo de estancia hospitalaria (días)<br>- Periodo de estancia en UCI (días)<br>- Días con ventilador mecánico<br>- Mortalidad intrahospitalaria. |

|                            |                     |                                                                                                                                                                                                                                                            |                                                                                                                                                                                                                                                                                                                                                         |                                                                                                                                                                                                                                                               |
|----------------------------|---------------------|------------------------------------------------------------------------------------------------------------------------------------------------------------------------------------------------------------------------------------------------------------|---------------------------------------------------------------------------------------------------------------------------------------------------------------------------------------------------------------------------------------------------------------------------------------------------------------------------------------------------------|---------------------------------------------------------------------------------------------------------------------------------------------------------------------------------------------------------------------------------------------------------------|
|                            |                     | traumatológica de Corea (primaria)                                                                                                                                                                                                                         | <ul style="list-style-type: none"> <li>- Triage, transfusión de emergencia, manejo de lesiones pélvicas y manejo de vía aérea</li> <li>- Número de pacientes de trauma</li> <li>- Tiempo de transfusión de emergencia &lt; 15 min</li> <li>- Tiempo hasta el quirófano &lt; 90 min</li> <li>- Control de hemorragia e hipotensión &lt; 1</li> </ul>     |                                                                                                                                                                                                                                                               |
| Khoury, 2016 <sup>52</sup> | Cohorte prospectiva | <p>Registros de ambulancia; registros del SU; registros de hospitalización y alta de pacientes; registros de quirófano y registro nacional de trauma de Israel (secundaria)</p> <p>Aplicación de cuestionario estructurado a todos los lesionados para</p> | <ul style="list-style-type: none"> <li>- Tipo de transporte para llegar a la unidad de atención (traslado aéreo, ambulancia terrestre de cuidados intensivos y ambulancia terrestre básica)</li> <li>- Tiempo de llegada desde la lesión hasta el ingreso (minutos)</li> <li>- Tiempo hasta la cirugía (minutos)</li> <li>- Tipo de implante</li> </ul> | <ul style="list-style-type: none"> <li>- Periodo de estancia hospitalaria (días)</li> <li>- Periodo de estancia en UCI (días)</li> <li>- Complicaciones posoperatorias e intraoperatorias (<b>anexo 1</b>)</li> <li>- Mortalidad intrahospitalaria</li> </ul> |

|                             |                     |                                                                                           |                                                                                                                                                                                                                                                                       |                                                                                                                                                                                                                                                                            |
|-----------------------------|---------------------|-------------------------------------------------------------------------------------------|-----------------------------------------------------------------------------------------------------------------------------------------------------------------------------------------------------------------------------------------------------------------------|----------------------------------------------------------------------------------------------------------------------------------------------------------------------------------------------------------------------------------------------------------------------------|
|                             |                     | completarlo al alta, 6 semanas y 6 meses después de la operación (primaria)               |                                                                                                                                                                                                                                                                       |                                                                                                                                                                                                                                                                            |
| Maddy, 2016 <sup>53</sup>   | Transversal         | Registros del sistema de trauma del departamento de defensa (primaria)                    | - Implementación del triaje y manejo de la persona lesionada en la escena por diferentes proveedores (médicos, enfermeras, paramédicos y proveedores de nivel avanzado)                                                                                               | <ul style="list-style-type: none"> <li>- Días con apoyo de ventilador mecánico</li> <li>- Periodo de estancia en UCI (días)</li> <li>- Periodo de estancia hospitalario (días)</li> <li>- Mortalidad intrahospitalaria</li> <li>- Mortalidad a 30 días del alta</li> </ul> |
| Newgard, 2017 <sup>54</sup> | Cohorte prospectiva | Base de datos de proveedores de AMP y registros hospitalarios (secundaria)                | <ul style="list-style-type: none"> <li>- La sensibilidad del triaje rural comparado con el triaje urbano en el sitio de lesión para identificar pacientes que requerían atención crítica temprana</li> <li>- Intervalos de tiempo hasta llegar al hospital</li> </ul> | <ul style="list-style-type: none"> <li>- Tasa de traslados</li> <li>- Mortalidad AMP</li> <li>- Mortalidad intrahospitalaria</li> </ul>                                                                                                                                    |
| Raj, 2019 <sup>13</sup>     | Transversal         | Base de datos de llamadas de urgencias y sistema de información del hospital (secundaria) | <ul style="list-style-type: none"> <li>- Tiempo hasta la reunión del equipo de trauma (&lt; 5 min)</li> <li>- Tiempo hasta TAC &lt; 1 h desde su solicitud en el SU</li> </ul>                                                                                        | <ul style="list-style-type: none"> <li>- Mortalidad en servicio de urgencias</li> <li>- Mortalidad en servicio de hospitalización</li> </ul>                                                                                                                               |

|                                   |                          |                                                                                                                   |                                                                                                                                                                                                                                                                                                                                                                                                                                                                |                                                                                                                                                                                                                                                                                                                                                                                                                                                                                                                                                                                                                                                                                                     |
|-----------------------------------|--------------------------|-------------------------------------------------------------------------------------------------------------------|----------------------------------------------------------------------------------------------------------------------------------------------------------------------------------------------------------------------------------------------------------------------------------------------------------------------------------------------------------------------------------------------------------------------------------------------------------------|-----------------------------------------------------------------------------------------------------------------------------------------------------------------------------------------------------------------------------------------------------------------------------------------------------------------------------------------------------------------------------------------------------------------------------------------------------------------------------------------------------------------------------------------------------------------------------------------------------------------------------------------------------------------------------------------------------|
| Smith,<br>2019 <sup>55</sup>      | Cohorte<br>prospectiva   | Registro de<br>Traumatismos<br>y Servicios<br>Médicos de<br>Emergencia<br>de Nueva<br>Orleans<br>(secundaria)     | <ul style="list-style-type: none"> <li>- Tipo del rescatista que aplicó el torniquete (minutos)</li> <li>- Duración del torniquete para llegar al departamento de emergencias (minutos)</li> <li>- Efectividad del torniquete</li> </ul>                                                                                                                                                                                                                       | <ul style="list-style-type: none"> <li>- Utilización de hemoderivados, presencia de shock al llegar, complicaciones en las extremidades relacionadas con el uso de torniquetes</li> <li>- La llegada al SU en estado de shock se definió como una presión arterial sistólica inicial <math>\leq 90</math> mmHg</li> <li>- Lesión mayor de las extremidades se definió como lesiones con lesión vascular importante (vasos sanguíneos que requieren una intervención para controlar la hemorragia), amputación traumática o cuasi amputación.</li> <li>- Periodo de estancia hospitalaria (días),</li> <li>- Periodo de estancia en UCI (días) y</li> <li>- Mortalidad intrahospitalaria.</li> </ul> |
| Moore,<br>2012 <sup>56</sup>      | Descriptivo              | Generación de<br>instrumentos y<br>entrevista a<br>directivos y<br>administradores<br>hospitalarios<br>(primaria) | <ul style="list-style-type: none"> <li>- Acreditación/verificación de centros de trauma</li> <li>- Aplicación de protocolos para definir niveles de los centros de trauma</li> <li>- Disposición y cumplimiento de criterios para activación de equipo de trauma</li> <li>- Número de personas con traumatismos que fueron evaluados por el programa de trauma en el último año</li> <li>- Disposición y uso de un sistema de información de trauma</li> </ul> | <ul style="list-style-type: none"> <li>- Mortalidad intrahospitalaria</li> </ul>                                                                                                                                                                                                                                                                                                                                                                                                                                                                                                                                                                                                                    |
| Sutherland,<br>2021 <sup>57</sup> | Cohorte<br>retrospectiva | Aplicación de<br>encuesta a<br>personas                                                                           | <ul style="list-style-type: none"> <li>-Tipo de transporte utilizado durante la atención prehospitalaria (traslado en helicóptero vs ambulancia terrestre)</li> <li>- Turno en el que fue admitido en el SU (diurno o nocturno)</li> </ul>                                                                                                                                                                                                                     | <ul style="list-style-type: none"> <li>- Análisis comparativo de la tasa de mortalidad hospitalaria</li> </ul>                                                                                                                                                                                                                                                                                                                                                                                                                                                                                                                                                                                      |

|                                |                       |                                                                                                                        |                                                                                                                                                                                                                                                                                     |                                                                                                                                                                                                                                                                                               |
|--------------------------------|-----------------------|------------------------------------------------------------------------------------------------------------------------|-------------------------------------------------------------------------------------------------------------------------------------------------------------------------------------------------------------------------------------------------------------------------------------|-----------------------------------------------------------------------------------------------------------------------------------------------------------------------------------------------------------------------------------------------------------------------------------------------|
|                                |                       | lesionadas en SU (primaria)                                                                                            |                                                                                                                                                                                                                                                                                     |                                                                                                                                                                                                                                                                                               |
| Vera-López, 2018 <sup>14</sup> | Transversal           | Diseño e implementación de sistema de información hospitalario, registros médicos y entrevista a lesionados (primaria) | - Tiempo desde que ocurrió la lesión hasta el primer contacto con la atención de emergencias ya sea con la AMP o directo en el centro de atención (minutos)                                                                                                                         | <ul style="list-style-type: none"> <li>- Mortalidad intrahospitalaria</li> <li>- Discapacidad desde la perspectiva del médico</li> <li>- Periodo de estancia hospitalaria (días)</li> </ul>                                                                                                   |
| Walther, 2014 <sup>58</sup>    | Transversal           | Registro de trauma de Ohio (secundaria)                                                                                | <ul style="list-style-type: none"> <li>- Verificación y certificación de centros de atención traumatológica</li> <li>- Apego y cumplimiento de los protocolos y programas de manejo de trauma en adolescentes en hospitales pediátrico comparado con hospital de adultos</li> </ul> | <ul style="list-style-type: none"> <li>- Análisis comparativo de periodo de estancia hospitalaria &gt; 24 h</li> <li>- Periodo de estancia hospitalaria en UCI (días)</li> <li>- Mortalidad en centro de atención traumatológico para adultos vs. centro traumatológico pediátrico</li> </ul> |
| Wandling, 2018 <sup>59</sup>   | Cohorte retrospectiva | Banco Nacional de Datos de Trauma (secundaria)                                                                         | - Transporte de personas lesionadas que recibieron AMP comparada con las que se trasladaron por vehículo privado                                                                                                                                                                    | Mortalidad intrahospitalaria                                                                                                                                                                                                                                                                  |
| Waxman, 2012 <sup>60</sup>     | Transversal           | Registros patrulleros de California                                                                                    |                                                                                                                                                                                                                                                                                     | - Análisis comparativo de la mortalidad intrahospitalaria en condados con centros de atención traumatológica vs.                                                                                                                                                                              |

|                                                                   |  |              |  |                                                                                    |
|-------------------------------------------------------------------|--|--------------|--|------------------------------------------------------------------------------------|
|                                                                   |  | (secundaria) |  | mortalidad intrahospitalaria en condados<br>sin centros de atención traumatológica |
| Fuente: Elaboración propia a partir de la bibliografía consultada |  |              |  |                                                                                    |
