# Supplementary material for: Indicators to measure the performance of emergency trauma care
Source: PubMed Central journal article supplement — Rev Med Inst Mex Seguro Soc. 2023 Nov-Dec;61(6):819–40. [Article in Spanish] doi: 10.5281/zenodo.10064412 (PMC10721338; doi:10.5281/zenodo.10064412), 2023
Supplement: 04435117-61-6-819-SM2.pdf [file 04435117-61-6-819-SM2.pdf]

| <b>Anexo 2</b> Complicaciones clínicas referidas en investigaciones |                                                                                                                                                                                                                                                                                                                                                                                                                                                                                                                                                                                                                                                                                                                                                                                                                                                                                                                                                                                                                                                                                                                                                                                                        |
|---------------------------------------------------------------------|--------------------------------------------------------------------------------------------------------------------------------------------------------------------------------------------------------------------------------------------------------------------------------------------------------------------------------------------------------------------------------------------------------------------------------------------------------------------------------------------------------------------------------------------------------------------------------------------------------------------------------------------------------------------------------------------------------------------------------------------------------------------------------------------------------------------------------------------------------------------------------------------------------------------------------------------------------------------------------------------------------------------------------------------------------------------------------------------------------------------------------------------------------------------------------------------------------|
| <b>Autor, año</b>                                                   | <b>Complicación</b>                                                                                                                                                                                                                                                                                                                                                                                                                                                                                                                                                                                                                                                                                                                                                                                                                                                                                                                                                                                                                                                                                                                                                                                    |
| Havermans, 2019 <sup>73</sup>                                       | Neumonía, delirio, infección del tracto urinario, infección de herida, retención vesical y falla del material de osteosíntesis                                                                                                                                                                                                                                                                                                                                                                                                                                                                                                                                                                                                                                                                                                                                                                                                                                                                                                                                                                                                                                                                         |
| Matsushima, 2013 <sup>74</sup>                                      | <p>-Pulmonar</p> <p>Síndrome de dificultad respiratoria aguda, insuficiencia respiratoria aguda que requiere soporte ventilatorio prolongado (mínimo 48 horas), aspiración/neumonía por aspiración, embolia grasa, neumonía, neumotórax, embolia pulmonar</p> <p>- Cardiovascular</p> <p>Paro cardiopulmonar (que no provoca la muerte), oclusión arterial aguda, arritmia mayor, trombosis venosa profunda, infarto de miocardio, hematológico/coagulopatía, reacción a la transfusión, coagulopatía</p> <p>-Renal</p> <p>Fallo renal agudo</p> <p>-Hepático</p> <p>Insuficiencia hepática</p> <p>-Infección/sepsis</p> <p>Sepsis/septicemia, sinusitis, infección de tejidos blandos, infección del tracto urinario, infección de heridas</p> <p>-Manejo de la vía aérea</p> <p>Intubación esofágica, intubación bronquial principal</p> <p>-Gastrointestinal</p> <p>Hemorragia gastrointestinal, obstrucción del intestino delgado</p> <p>-Neurológico</p> <p>Infección del sistema nervioso central, progresión de la lesión neurológica original, convulsiones</p> <p>-Decúbito</p> <p>Dehiscencia, úlcera de decúbito, hipotermia, hemorragia posoperatoria, reacción adversa al medicamento</p> |

|                                                                          |                                                                                                                                                                                                                                                                                                                                                                                                                                                                                                                                                                                                       |
|--------------------------------------------------------------------------|-------------------------------------------------------------------------------------------------------------------------------------------------------------------------------------------------------------------------------------------------------------------------------------------------------------------------------------------------------------------------------------------------------------------------------------------------------------------------------------------------------------------------------------------------------------------------------------------------------|
| Moore, 2015 <sup>75</sup>                                                | Síndrome de dificultad respiratoria aguda, insuficiencia respiratoria aguda, neumonía adquirida en el hospital, embolia pulmonar, paro cardíaco, shock hemorrágico posoperatorio, infarto de miocardio, síndrome compartimental abdominal, colitis, evisceración/dehiscencia, coagulopatía, infección relacionada con el catéter venoso central, sepsis/sepsis grave/shock, infección de heridas, insuficiencia renal aguda, úlceras de decúbito, síndrome compartimental de las extremidades, pseudoartrosis fractura, osteomielitis, accidente cerebrovascular, trombosis venosa profunda y delirio |
| Gough, 2020 <sup>76</sup>                                                | Lesión renal aguda, trombosis venosa profunda, infección del tracto urinario asociada al catéter, síndrome compartimental de las extremidades, accidente vascular cerebral y neumonía                                                                                                                                                                                                                                                                                                                                                                                                                 |
| Khoury, 2016 <sup>77</sup>                                               | Complicaciones posoperatorias e intraoperatorias (ortopédicas y no ortopédicas [unión defectuosa, pérdida de sangre intraoperatoria] 6 semanas y 6 meses)                                                                                                                                                                                                                                                                                                                                                                                                                                             |
| Smith, 2019 <sup>78</sup>                                                | Complicaciones en las extremidades relacionadas con el uso de torniquetes, complicaciones sistémicas. La lesión mayor de las extremidades se definió como lesiones con lesión vascular importante (lesiones de los vasos sanguíneos que requieren una intervención de procedimiento para controlar la hemorragia), amputación traumática o cuasi amputación.                                                                                                                                                                                                                                          |
| <b>Fuente:</b> elaboración propia a partir de la bibliografía consultada |                                                                                                                                                                                                                                                                                                                                                                                                                                                                                                                                                                                                       |
